# Supplementary material
Source: PubMed Central journal article supplement (PMC2608726)
Supplement: NIHMS69856-supplement-01.pdf [file NIHMS69856-supplement-01.pdf]

Supplemental Data

Antiretroelement Activity of APOBEC3H

Was Lost Twice in Recent Human Evolution

Molly Oh Ainle, Julie A. Kerns, Melody M.H. Li, Harmit S. Malik, and Michael Emerman

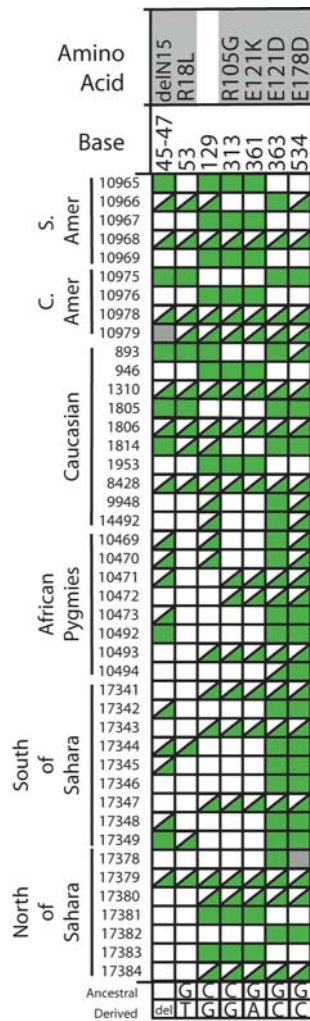

**Figure S1. Genotyping the APOBEC3H Coding Sequence in a Panel of Diverse Humans**

The *APOBEC3H* coding sequence was sequenced from genomic DNA from 5 South American, 4 Central American, 10 Caucasian, 8 African Pygmy, 9 South of Sahara and 7 North of Sahara individuals. The seven polymorphisms typed in the panel are detailed at the top of the figure (the six non-synonymous polymorphisms are shown in gray – delN15, R18L, R105G, E121K, E121D and E178D). All polymorphisms are shown as changes from the ancestral sequence (ancestral and derived bases at each position are shown at bottom of figure) and do not necessarily represent minor alleles. Derived changes are shown in green and ancestral states are shown in white with heterozygotes represented by split squares. Missing data is shown in gray. Haplotypes that encode stable proteins contain G105 and do not have the deletion at position N15 (delN15).

CLUSTAL 2.0.5 multiple sequence alignment

```

hapIII      MALLTAETFRLQFN-KRRLRRPYYPKALLCYQLTPQNGSTPTRGYFENKKKCHAEICFI 59
hapIV      MALLTAETFRLQFN-KRLLRRPYYPKALLCYQLTPQNGSTPTRGYFENKKKCHAEICFI 59
hapII      MALLTAETFRLQFNKRRLRRPYYPKALLCYQLTPQNGSTPTRGYFENKKKCHAEICFI 60
hapI       MALLTAETFRLQFNKRRLRRPYYPKALLCYQLTPQNGSTPTRGYFENKKKCHAEICFI 60
human_ancestor
chimpanzee MALLTAETFRLQFNKRRLRRPYYPKALLCYQLTPQNGSTPTRGYFENKKKCHAEICFI 60
hu_ch_ancestor
gorilla    MALLTAETFRLQFNKRRLRRPYYPKALLCYQLTPQNGSMPTRGYFKNKKKCHAEICFI 60
***** : ***** **;***** *****;*****

hapIII      NEIKSMGLDETQCYQVTCYLTWSPCSSCAWELVDFIKAHDHLNLRIFASRLYYHWCKPQQ 119
hapIV      NEIKSMGLDETQCYQVTCYLTWSPCSSCAWELVDFIKAHDHLNLRIFASRLYYHWCKPQQ 119
hapII      NEIKSMGLDETQCYQVTCYLTWSPCSSCAWELVDFIKAHDHLNLRIFASRLYYHWCKPQQ 120
hapI       NEIKSMGLDETQCYQVTCYLTWSPCSSCAWELVDFIKAHDHLNLGIFASRLYYHWCKPQQ 120
human_ancestor
chimpanzee NEIKSMGLDETQCYQVTCYLTWSPCSSCAWELVDFIKAHDHLNLRIFASRLYYHWCKPQQ 120
hu_ch_ancestor
gorilla    NEIKSMGLDETQCYQVTCYLTWSPCSSCAWKLVDFIKAHDHLNLRIFASRLYYHWCKPQQ 120
*****;*****;***** ***** **

hapIII      DGLRLLCGSQVPVEVMGFPEFADCWENFVDHEKPLSFNPYKMLEELDKNSRAIKRRLDRI 179
hapIV      DGLRLLCGSQVPVEVMGFPEFADCWENFVDHEKPLSFNPYKMLEELDKNSRAIKRRLDRI 179
hapII      DGLRLLCGSQVPVEVMGFPEFADCWENFVDHEKPLSFNPYKMLEELDKNSRAIKRRLDRI 180
hapI       KGLRLLCGSQVPVEVMGFPEFADCWENFVDHEKPLSFNPYKMLEELDKNSRAIKRRLERI 180
human_ancestor
chimpanzee EGLRLLCGSQVPVEVMGFPEFADCWENFVDHEKPLSFNPYKMLEELDKNSRAIKRRLERI 180
hu_ch_ancestor
gorilla    EGLRLLCGSQVPVEVMGFPEFADCWENFVDHEKPLSFDPSKMLEELDKNSRAIKRRLERI 180
.*****;*** *****;.* *****;***

hapIII      QQS----- 182
hapIV      QQS----- 182
hapII      QQS----- 183
hapI       QQS----- 183
human_ancestor
chimpanzee QQS----- 183
hu_ch_ancestor
gorilla    QQS----- 183
KQSWSDVLENDLRSLQLGVPVSHSLRSNSR 211
***

```

**Figure S2. Alignment of Gorilla, Chimpanzee and Predicted Human and Ancestral Human APOBEC3H Protein Sequences**

Amino acid sequences of gorilla, chimpanzee, the PHASE-predicted human APOBEC3H haplotypes (hapI, hapII, hapIII and hapIV) as well as the parsimony-predicted human ancestor APOBEC3H (human ancestor) and human/chimpanzee APOBEC3H (hu\_ch\_ancestor) proteins were aligned using CLUSTAL\_X (Thompson et al., 1997). Underlined in the human/chimpanzee ancestor sequence is the site (aa 160) at which parsimony could not yield a simple prediction of the ancestral state; therefore, three versions of the protein, 160C, 160Y and 160S (data shown is for 160S version), were constructed and found to encode proteins of similar stabilities and antiviral activities.

**Table S1. Human APOBEC3H Haplotype Frequencies**

Frequencies of the predicted *APOBEC3H* haplotypes as inferred using PHASE 2.1.1 software (Stephens and Donnelly, 2003; Stephens et al., 2001). Haplotypes found at frequencies > 10% are highlighted in bold.

| index     | haplotype      | E (freq)        | S.E.            |
|-----------|----------------|-----------------|-----------------|
| 1         | 1TGCGCC        | 0.00148         | 0.00388         |
| 2         | 1TGCGCG        | 0.001593        | 0.004926        |
| 3         | 1TGGAGC        | 0.000463        | 0.002274        |
| 4         | 1TGGAGG        | 0.002247        | 0.005927        |
| <b>5</b>  | <b>1TCCGCC</b> | <b>0.177715</b> | <b>0.01187</b>  |
| 6         | 1TCCGCG        | 0.000234        | 0.001634        |
| 7         | 1GGCGCC        | 0.000117        | 0.00116         |
| 8         | 1GGCGCG        | 0.001856        | 0.005638        |
| 9         | 1GGGAGG        | 0.02652         | 0.005603        |
| <b>10</b> | <b>1GCCGCC</b> | <b>0.113544</b> | <b>0.009882</b> |
| 11        | 1GCCGCG        | 0.00023         | 0.001624        |
| 12        | 0TGCGCC        | 0.00081         | 0.003389        |
| 13        | 0TGCGCG        | 0.01218         | 0.005034        |
| 14        | 0TGGAGG        | 0.00012         | 0.001183        |
| 15        | 0TCCGCC        | 0.00083         | 0.003008        |
| 16        | 0GGCGCC        | 0.010153        | 0.005361        |
| 17        | 0GGCGCG        | 0.053672        | 0.007507        |
| 18        | 0GGGAGC        | 0.011164        | 0.002282        |
| <b>19</b> | <b>0GGGAGG</b> | <b>0.30762</b>  | <b>0.008177</b> |
| <b>20</b> | <b>0GCCGCC</b> | <b>0.264882</b> | <b>0.014036</b> |
| 21        | 0GCCGCG        | 0.000239        | 0.001654        |
| 22        | 0GCGAGG        | 0.0121          | 0.002301        |

**Table S2. Human APOBEC3H Haplotype Counts**

Numbers of each haplotype identified in the panel according to the "best reconstruction" by PHASE. The single haplotype in which both the delN15 and the R105G polymorphisms are found on the same chromosome is shown in bold (2/86 chromosomes).

|          | Haplotype      | Count    |
|----------|----------------|----------|
| 1        | 1TCCGCC        | 16       |
| <b>2</b> | <b>1GGGAGG</b> | <b>2</b> |
| 3        | 1GCCGCC        | 10       |
| 4        | 0TGCGCG        | 1        |
| 5        | 0GGCGCC        | 1        |
| 6        | 0GGCGCG        | 5        |
| 7        | 0GGGAGC        | 1        |
| 8        | 0GGGAGG        | 27       |
| 9        | 0GCCGCC        | 22       |
| 10       | 0GCGAGG        | 1        |

**Table S3. Typing the APOBEC3B Deletion**

Genotyping of the APOBEC3B deletion in the African American, European American and Han Chinese populations. Presence of deletion is denoted by 1; absence of deletion is denoted by 0.

| sample ID<br>(NA-----) | population       | Genotype |
|------------------------|------------------|----------|
| 17102                  | African American | 0 0      |
| 17103                  | African American | 1 0      |
| 17104                  | African American | 0 0      |
| 17105                  | African American | 0 0      |
| 17106                  | African American | 0 0      |
| 17107                  | African American | 0 0      |
| 17108                  | African American | 0 0      |
| 17109                  | African American | 0 0      |
| 17110                  | African American | 0 0      |
| 17111                  | African American | 0 0      |
| 17113                  | African American | 0 0      |
| 17116                  | African American | 0 0      |
| 17125                  | African American | 0 0      |
| 17133                  | African American | 0 0      |
| 17135                  | African American | 0 0      |
| 17136                  | African American | 0 0      |
| 17137                  | African American | 0 0      |
| 17138                  | African American | 0 0      |
| 17139                  | African American | 1 0      |
| 17140                  | African American | 0 0      |
| 6990                   | European (EC)    | 0 0      |
| 7019                   | European (EC)    | 0 0      |
| 7348                   | European (EC)    | 0 0      |
| 7349                   | European (EC)    | 0 0      |
| 10830                  | European (EC)    | 1 0      |
| 10831                  | European (EC)    | 0 0      |
| 10842                  | European (EC)    | 0 0      |
| 10843                  | European (EC)    | 0 0      |
| 10844                  | European (EC)    | 0 0      |
| 10845                  | European (EC)    | 0 0      |
| 10848                  | European (EC)    | 0 0      |
| 10850                  | European (EC)    | 0 0      |
| 10851                  | European (EC)    | 0 0      |
| 10852                  | European (EC)    | 0 0      |
| 10853                  | European (EC)    | 0 0      |
| 10854                  | European (EC)    | 0 0      |
| 10857                  | European (EC)    | 0 0      |
| 10858                  | European (EC)    | 1 0      |
| 10861                  | European (EC)    | 0 0      |
| 12547                  | European (EC)    | 0 0      |
| 12548                  | European (EC)    | 0 0      |
| 12560                  | European (EC)    | 0 0      |
| 17201                  | European (EC)    | 0 0      |
| 17733                  | Han Chinese (HL) | 0 0      |

|       |                  |     |
|-------|------------------|-----|
| 17734 | Han Chinese (HL) | 1 1 |
| 17735 | Han Chinese (HL) | 0 0 |
| 17736 | Han Chinese (HL) | 0 0 |
| 17737 | Han Chinese (HL) | 1 0 |
| 17739 | Han Chinese (HL) | 1 0 |
| 17740 | Han Chinese (HL) | 0 0 |
| 17741 | Han Chinese (HL) | 1 0 |
| 17742 | Han Chinese (HL) | 1 1 |
| 17743 | Han Chinese (HL) | 1 0 |
| 17744 | Han Chinese (HL) | 1 0 |
| 17745 | Han Chinese (HL) | 1 0 |
| 17746 | Han Chinese (HL) | 1 1 |
| 17747 | Han Chinese (HL) | 0 0 |
| 17749 | Han Chinese (HL) | 1 0 |
| 17752 | Han Chinese (HL) | 1 1 |
| 17753 | Han Chinese (HL) | 1 0 |
| 17754 | Han Chinese (HL) | 1 1 |
| 17755 | Han Chinese (HL) | 1 0 |
| 17756 | Han Chinese (HL) | 0 0 |
| 17757 | Han Chinese (HL) | 1 0 |
| 17759 | Han Chinese (HL) | 1 0 |
| 17761 | Han Chinese (HL) | 0 0 |

**Table S4. APOBEC3H Primers**

| Primer | Sequence (5' to 3')              |
|--------|----------------------------------|
| 012    | AACTGACATGCCCCAGGG               |
| 015    | ACACGATGGCTCTGTTAACAGCC          |
| 36     | GCTCTGTTAACAGCCGAAAC             |
| 43     | GGTACCGGCTCTGTTAACAGCCGAAACATTCC |
| 73     | ACACGATGGCTCTCCTAACAGCC          |
| 08     | GGGTGCGTGAGTGCAGGG               |
| 10     | TTGAAAACTACCTATTGGGTGC           |
| 85     | AMJGTTAACAGCCGAAACATTCCGCTTAC    |
| 86     | ACCTTGTTTTCAAAGTAGCCTCT          |
| For    | ACACGATGGCTCTGTTAACAGCC          |
| Rev    | GCACCCGCTTCCTGCC                 |
| 3_For  | GGGTGCGTGAGTGCAGGG               |
| 3_Rev  | TTGAAAACTACCTATTGGGTGC           |
| For    | ACCCAATAGGTAGTTTTTCAACCC         |
| Rev    | AACTGACATGCCCCAGGG               |
| 76     | TCTGTTGCACAGAAACACGATGG          |
| 71     | TTCCCGAAGTAGTGAAGTACTGAGC        |
| 72     | GCCACGCACTAGAAAGTTCAC            |
| 73     | CGGGTGGTGTGATCAGATCTTG           |
| 74     | TCTGACACCACCCGGGAG               |
| 75     | ACAGTGCCTCACCTTTATCC             |

## Supplemental References

Stephens, M., and Donnelly, P. (2003). A comparison of bayesian methods for haplotype reconstruction from population genotype data. *Am J Hum Genet* 73, 1162-1169.

Stephens, M., Smith, N. J., and Donnelly, P. (2001). A new statistical method for haplotype reconstruction from population data. *Am J Hum Genet* 68, 978-989.

Thompson, J. D., Gibson, T. J., Plewniak, F., Jeanmougin, F., and Higgins, D. G. (1997). The CLUSTAL\_X windows interface: flexible strategies for multiple sequence alignment aided by quality analysis tools. *Nucleic Acids Res* 25, 4876-4882.
